# Supplementary material
Source: Springer Nature journal article supplement (https://www.springermedizin.de/resource/supplementary/13063_2011_930_MOESM1_ESM.pdf/9618718)
Supplement: MOESM1 [file 9618718]

**Enrollment**

Assessed for eligibility (n = ...)

Excluded (n = ...)  
Not meeting inclusion criteria (n = ...)  
Declined to participate (n = ...)  
Other reasons (n = ...)

Randomised (n = ...)

**Allocation**

Allocated to intervention (n = ...)  
Received allocated intervention (n = ...)  
Did not receive allocated intervention (give reasons) (n = ...)

Allocated to intervention (n = ...)  
Received allocated intervention (n = ...)  
Did not receive allocated intervention (give reasons) (n = ...)

**Follow up**

Lost to follow up (n = ...) (give reasons)  
Discontinued intervention (n = ...) (give reasons)

Lost to follow up (n = ...) (give reasons)  
Discontinued intervention (n = ...) (give reasons)

**Analysis**

Analysed (n = ...)  
Excluded from analysis (give reasons) (n = ...)

Analysed (n = ...)  
Excluded from analysis (give reasons) (n = ...)
